# Supplementary material for: Superfine palladium nanocrystals on a polyphenylene framework for photocatalysis
Source: Royal Society of Chemistry journal article supplement (doi:10.1039/c8cy01513a), 2018-01-01
Supplement: c8cy01513a1.pdf [file c8cy01513a1.pdf]

## Supporting Information

### Superfine Palladium Nanocrystals on Polyphenylene Framework for Photocatalysis

Yufan Gu,<sup>a,b</sup> Junjian Li,<sup>c</sup> Aming Xie,<sup>\*,a</sup> Kun Zhang,<sup>a,b</sup> Yingzhi Jiao,<sup>b</sup> Wei Dong<sup>\*,b</sup>

<sup>a</sup> School of Mechanical Engineering and <sup>b</sup> School of Chemical Engineering, Nanjing University of Science & Technology, Nanjing 210094, China

<sup>c</sup> Key Laboratory of Tropical Biological Resources of Ministry of Education, Department of Pharmacy, College of Marine Science, Hainan University, Haikou, 570228, China

Corresponding authors: [xieaming@njust.edu.cn](mailto:xieaming@njust.edu.cn) (Aming Xie) and [weidong@njust.edu.cn](mailto:weidong@njust.edu.cn) (Wei Dong)

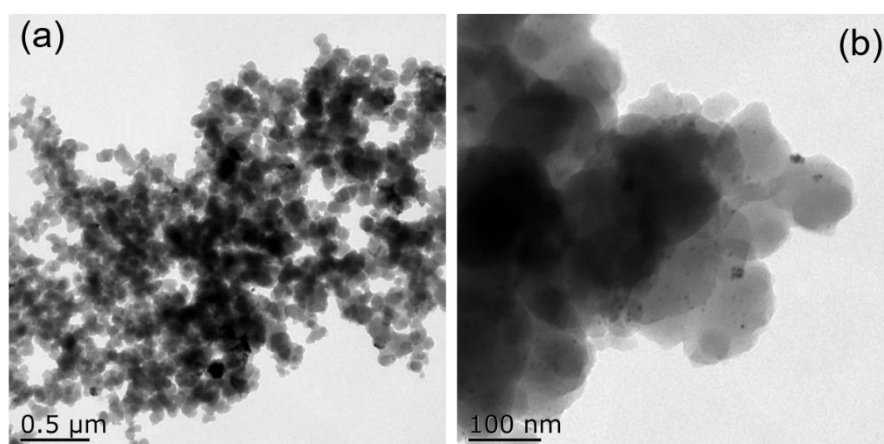

**Fig. S1** (a,b) TEM images of Cat-1.

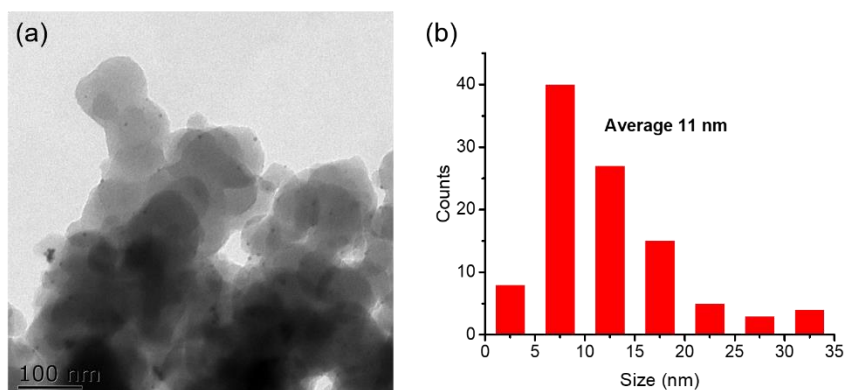

**Fig. S2** (a) TEM image and (b) size analysis of Cat-1.

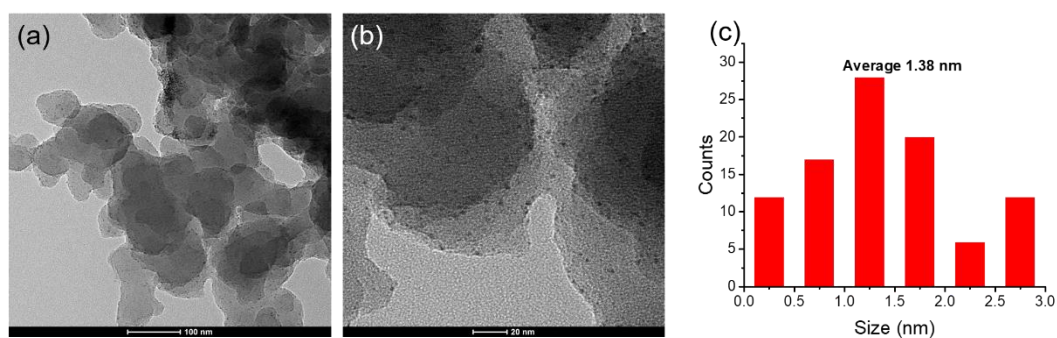

**Fig. S3** (a,b) TEM images and (b) size analysis of Cat-3.

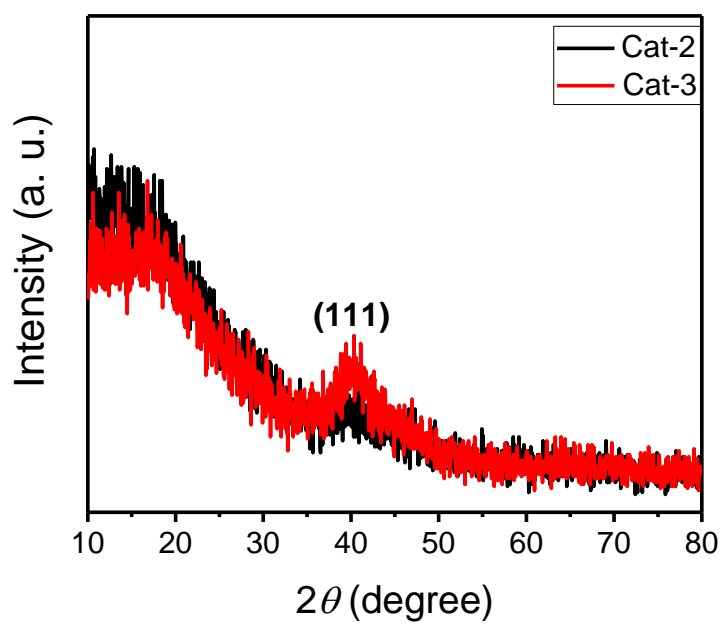

**Fig. S4** XRD patterns of Cat-2 and Cat-3.

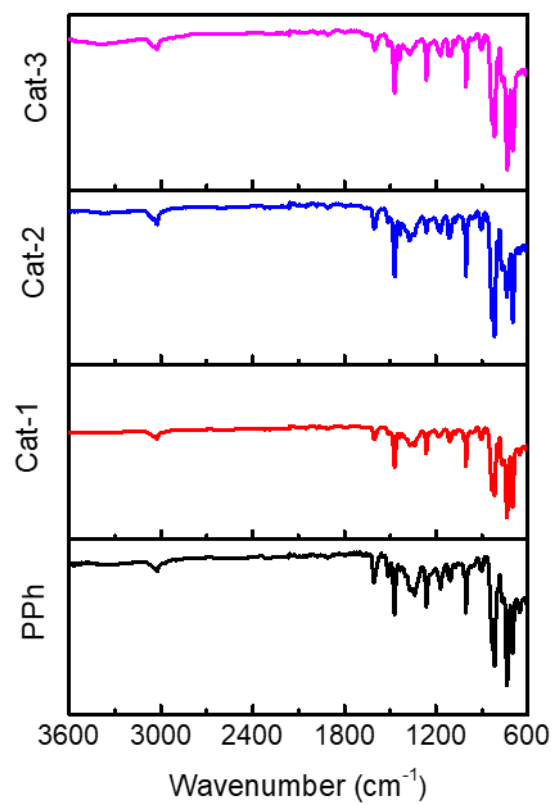

**Fig. S5** FT-IR spectra of PPh and Pd/PPh photocatalysts.
